# Supplementary material for: Improving vaccination coverage in India: lessons from Intensified Mission Indradhanush, a cross-sectoral systems strengthening strategy
Source: PubMed Central journal article supplement — BMJ. 2018 Dec 7;363:k4782. doi: 10.1136/bmj.k4782 (PMC6282735; doi:10.1136/bmj.k4782), 2018-12-07
Supplement: gurj47392.ww2.pdf [file gurj47392.ww2.pdf]

## **Supplementary File 2: Summary of methods and findings from population-based household surveys used to assess immunization coverage pre- and post-IMI**

### **National Family Health Survey 4 (NFHS 4; 2015-16)<sup>a</sup>**

For the NFHS 4 survey, a total of 628,900 households were sampled across 640 districts covering all states and union territories. At district level 70% of the sample was rural and 30% urban. The rural sample was selected using a two-stage sample design with villages as the Primary Sampling Units (PSUs) in the first stage (selected with probability proportional to size), followed by a random selection of 22 households in each PSU in the second stage. In urban areas, a two-stage sample design was also used with Census Enumeration Blocks (CEB) selected in the first stage and 22 households in each CEB randomly selected in the second stage. For second stage sampling in both urban and rural areas, households were selected after conducting a complete mapping and household listing operation in the selected first-stage units. In each district about 44 PSUs were selected. The PSUs with fewer than 40 households were linked to the nearest PSU. The PSUs with at least 300 households were divided into segments of approximately 100-150 households. Two of the segments were randomly selected for the survey using systematic sampling with probability proportional to segment size. Of the total selected households 616,346 were occupied and of these occupied households, 601,509 were successfully interviewed (response rate of 97.6%).

### **Coverage Evaluation Survey in IMI districts (IMI CES; 2018)<sup>b</sup>**

This cross-sectional multi-stage household cluster survey was designed to estimate full immunization coverage (FIC) among children 12-23 months of age in IMI districts. The coverage evaluation survey was conducted by the United Nations Development Program (UNDP) in 120 IMI districts and urban areas of six states (Assam, Bihar, Madhya Pradesh, Maharashtra, Rajasthan and Uttar Pradesh) and by the World Health Organisation (WHO) in the remaining 70 IMI districts, using the same standardized methodology. All enumerated villages and urban wards in IMI districts from the 2011 national census were included in the sampling frame. The primary sampling units (PSUs) were selected using a probability proportional to size sampling method. PSUs with smaller numbers of households than the cluster size were combined with a geographically contiguous neighbouring census village/urban area to form a single entry in the sampling frame. The PSUs with larger number of households than the cluster size were further divided into segments. A segment was randomly chosen from all such segments in the PSU to become the 'survey cluster.' In the 120 districts surveyed by UNDP, 66,794 children were included with urban: rural proportions of 22:78, about 100 (65-109) clusters per district, and 5-7 children per cluster. In the 70 districts surveyed by WHO, a total of 17,703 children were included with 155-206 children per district sampled from 30-40 clusters (cluster size of 60 to 100 households). The immunization card (Mother and Child Protection card) was available in 65.2% (46.3% - 86.2%) of cases in the 190 IMI districts surveyed.

---

<sup>a</sup> International Institute for Population Sciences (IIPS) and ICF. National Family Health Survey (NFHS-4), 2015-16: India. Mumbai: IIPS; 2017.

<sup>b</sup> Ministry of Health and Family Welfare (MOHFW). Coverage Evaluation Survey- Intensified Mission Indradhanush. Delhi, India: MOHFW; 2018.

**Supplementary Table 1: Changes in Full Immunization Coverage (FIC) by state and IMI district, population-based coverage surveys, 2015/16 and 2018<sup>1</sup>**

| Sl. No. | State             | District        | FIC- NFHS 4 <sup>2</sup> (%) | FIC -IMI CES (%) | CI FIC-IMI CES (%) | Change (%) |
|---------|-------------------|-----------------|------------------------------|------------------|--------------------|------------|
| 1       | Andhra Pradesh    | East Godavari   | 60.3                         | 94.1             | (90.5 - 97.7)      | 33.8       |
| 2       | Andhra Pradesh    | Nellore         | 47.7                         | 93               | (89.3 - 96.7)      | 45.3       |
| 3       | Arunachal Pradesh | Anjaw           | 35.8                         | 55.3             | (44.1 - 66.6)      | 19.5       |
| 4       | Arunachal Pradesh | Changlong       | 79.5                         | 81.3             | (75.6 - 87.0)      | 1.8        |
| 5       | Arunachal Pradesh | East Kameng     | 11.9                         | 59.8             | (54.3 - 65.3)      | 47.9       |
| 6       | Arunachal Pradesh | East Siang      | 45.5                         | 85.3             | (80.9 - 89.8)      | 39.8       |
| 7       | Arunachal Pradesh | Kra Daadi       | 17.4                         | 72.4             | (65.5 - 79.2)      | 55         |
| 8       | Arunachal Pradesh | Kurung Kumey    | 17.4                         | 84.6             | (79.0 - 90.3)      | 67.2       |
| 9       | Arunachal Pradesh | Lohit           | 56.5                         | 77.9             | (71.8 - 84.0)      | 21.4       |
| 10      | Arunachal Pradesh | Longding        | 45.3                         | 32               | (25.7 - 38.4)      | -13.3      |
| 11      | Arunachal Pradesh | Namsai          | 56.5                         | 58.2             | (50.5 - 65.8)      | 1.7        |
| 12      | Arunachal Pradesh | Papumpare       | 34.9                         | 69               | (61.9 - 76.1)      | 34.1       |
| 13      | Arunachal Pradesh | Tirap           | 45.3                         | 64.6             | (57.2 - 71.9)      | 19.3       |
| 14      | Arunachal Pradesh | Upper Siang     | 45.5                         | 85.4             | (79.8 - 91.0)      | 39.9       |
| 15      | Arunachal Pradesh | Upper Subansiri | 21.9                         | 35.1             | (30.4 - 39.7)      | 13.2       |
| 16      | Assam             | Chirang         | 40.4                         | 85.4             | (82.4-88.3)        | 45         |
| 17      | Assam             | Darrang         | 40.6                         | 60.3             | (56.2-64.4)        | 19.7       |
| 18      | Assam             | Dhubri          | 20.1                         | 65.2             | (60.5-69.9)        | 45.1       |
| 19      | Assam             | Goalpara        | 43.7                         | 51.1             | (47.0-55.3)        | 7.4        |
| 20      | Assam             | Karbi Anglong   | 23.6                         | 70.5             | (66.1-74.9)        | 46.9       |
| 21      | Assam             | Kokrajhar       | 42.1                         | 55.4             | (51.3-59.4)        | 13.3       |
| 22      | Assam             | Nagaon          | 43.1                         | 79               | (75.6-82.3)        | 35.9       |
| 23      | Bihar             | Araria          | 53.9                         | 72.6             | (68.9-76.3)        | 18.7       |
| 24      | Bihar             | Champan East    | 49.3                         | 73.2             | (69.2-77.1)        | 23.9       |
| 25      | Bihar             | Champan West    | 29.4                         | 83.7             | (80.7-86.7)        | 54.3       |
| 26      | Bihar             | Darbhanga       | 52.9                         | 71.1             | (67.3-74.9)        | 18.2       |
| 27      | Bihar             | Gaya            | 67.6                         | 68.9             | (64.9-72.9)        | 1.3        |
| 28      | Bihar             | Katihar         | 71.2                         | 69.1             | (64.0-74.2)        | -2.1       |
| 29      | Bihar             | Kishanganj      | 54.9                         | 80.5             | (77.3-83.7)        | 25.6       |
| 30      | Bihar             | Lakhisarai      | 59.1                         | 69.1             | (65.3-73.0)        | 10         |

| Sl. No. | State           | District           | FIC- NFHS 4 <sup>2</sup> (%) | FIC -IMI CES (%) | CI FIC-IMI CES (%) | Change (%) |
|---------|-----------------|--------------------|------------------------------|------------------|--------------------|------------|
| 31      | Bihar           | Madhubani          | 48.9                         | 65.4             | (61.6-69.3)        | 16.5       |
| 32      | Bihar           | Muzaffarpur        | 55                           | 62               | (58.1-66.0)        | 7          |
| 33      | Bihar           | Nawada             | 63.5                         | 80.2             | (76.7-83.7)        | 16.7       |
| 34      | Bihar           | Patna              | 69.7                         | 75.8             | (72.0-79.5)        | 6.1        |
| 35      | Bihar           | Saran              | 55.1                         | 67               | (63.3-70.8)        | 11.9       |
| 36      | Bihar           | Sheikhpura         | 63.5                         | 88.3             | (85.5-91.0)        | 24.8       |
| 37      | Bihar           | Sheohar            | 59.3                         | 59.2             | (55.1-63.3)        | -0.1       |
| 38      | Bihar           | Sitamarhi          | 62.6                         | 64.6             | (60.8-68.5)        | 2          |
| 39      | Delhi           | North              | 52.3                         | 85.7             | (81.0 - 90.4)      | 33.4       |
| 40      | Delhi           | Shahadara          | 55.2                         | 92.3             | (88.8 - 95.9)      | 37.1       |
| 41      | Delhi           | South-East         | 51.1                         | 91.1             | (87.3 - 95.0)      | 40         |
| 42      | Gujarat         | Banaskantha        | 35.3                         | 80.7             | (75.4 - 86.0)      | 45.4       |
| 43      | Gujarat         | Bhavnagar          | 52.4                         | 87.6             | (83.2 - 92.1)      | 35.2       |
| 44      | Gujarat         | Kutch              | 45                           | 77.7             | (72.2 - 83.2)      | 32.7       |
| 45      | Haryana         | Faridabad          | 46.3                         | 84.9             | (80.3 - 89.6)      | 38.6       |
| 46      | Haryana         | Gurgaon            | 23.6                         | 83.8             | (79.0 - 88.7)      | 60.2       |
| 47      | Haryana         | Mewat              | 13.1                         | 40.8             | (35.3 - 46.3)      | 27.7       |
| 48      | Haryana         | Palwal             | 25.3                         | 77.2             | (71.7 - 82.6)      | 51.9       |
| 49      | Jammu & Kashmir | Jammu              | 77.3                         | 97.9             | (96.0 - 99.8)      | 20.6       |
| 50      | Jharkhand       | Giridih            | 47.6                         | 66.6             | (60.4 - 72.8)      | 19         |
| 51      | Jharkhand       | Pakur              | 70.1                         | 77.1             | (71.4 - 82.7)      | 7          |
| 52      | Karnataka       | Bagalkot           | 75.9                         | 94.5             | (91.6 - 97.4)      | 18.6       |
| 53      | Karnataka       | Bangalore (U)      | 62.1                         | 93.3             | (90.0 - 96.5)      | 31.2       |
| 54      | Karnataka       | Belgaum            | 63.4                         | 94.9             | (92.2 - 97.5)      | 31.5       |
| 55      | Karnataka       | Kalburgi           | 58.6                         | 90.1             | (86.1 - 94.1)      | 31.5       |
| 56      | Karnataka       | Yadgir             | 61.3                         | 80.2             | (75.0 - 85.5)      | 18.9       |
| 57      | Kerala          | Malappuram         | 70.6                         | 78.6             | (74.7 - 82.5)      | 8          |
| 58      | Manipur         | Chandel            | 50.6                         | 74.4             | (69.2 - 79.6)      | 23.8       |
| 59      | Manipur         | Churachandpur      | 52.2                         | 66.2             | (60.7 - 71.8)      | 14         |
| 60      | Manipur         | Tamenglong         | 44                           | 61               | (55.4 - 66.5)      | 17         |
| 61      | Manipur         | Ukhrul             | 42.4                         | 61.6             | (55.6 - 67.6)      | 19.2       |
| 62      | Meghalaya       | East jaintia Hills | 68.3                         | 92.6             | (89.6 - 95.6)      | 24.3       |

| Sl. No. | State          | District              | FIC- NFHS 4 <sup>2</sup> (%) | FIC -IMI CES (%) | CI FIC-IMI CES (%) | Change (%) |
|---------|----------------|-----------------------|------------------------------|------------------|--------------------|------------|
| 63      | Meghalaya      | East Khasi Hills      | 68.7                         | 73.9             | (68.6 - 79.2)      | 5.2        |
| 64      | Meghalaya      | North Garo Hills      | 41.2                         | 70.9             | (65.2 - 76.6)      | 29.7       |
| 65      | Meghalaya      | South West Garo Hill  | 48                           | 87.1             | (83.1 - 91.2)      | 39.1       |
| 66      | Meghalaya      | South West Khasi Hill | 74.2                         | 80.2             | (75.7 - 84.7)      | 6          |
| 67      | Meghalaya      | West Garo Hills       | 48                           | 80.9             | (76.1 - 85.7)      | 32.9       |
| 68      | Meghalaya      | West Jaintia Hills    | 68.3                         | 89.8             | (86.3 - 93.4)      | 21.5       |
| 69      | Maharashtra    | Ahmednagar            | 43.4                         | 77.4             | (74.0-80.9)        | 34         |
| 70      | Maharashtra    | Beed                  | 53.9                         | 61.3             | (57.4-65.3)        | 7.4        |
| 71      | Maharashtra    | Gadchiroli            | 82                           | 84.8             | (80.9-88.7)        | 2.8        |
| 72      | Maharashtra    | Gr. Mumbai            | 45.6                         | 65               | (61.4-68.6)        | 19.4       |
| 73      | Maharashtra    | Jalgaon               | 43.2                         | 48.1             | (44.0-52.2)        | 4.9        |
| 74      | Maharashtra    | Nanded                | 51.1                         | 86.2             | (83.4-89.0)        | 35.1       |
| 75      | Maharashtra    | Nandurbar             | 32.8                         | 69.4             | (65.4-73.4)        | 36.6       |
| 76      | Maharashtra    | Nasik                 | 62.3                         | 79.4             | (76.0-82.8)        | 17.1       |
| 77      | Maharashtra    | Solapur               | 64.9                         | 78.6             | (75.1-82.2)        | 13.7       |
| 78      | Maharashtra    | Thane                 | 40.9                         | 57.5             | (53.4-61.6)        | 16.6       |
| 79      | Maharashtra    | Yavatmal              | 61.6                         | 78.2             | (74.7-81.6)        | 16.6       |
| 80      | Mizoram        | Lawngtlai             | 42.2                         | 68.5             | (62.8 - 74.2)      | 26.3       |
| 81      | Mizoram        | Lunglei               | 46.4                         | 79.2             | (74.2 - 84.1)      | 32.8       |
| 82      | Mizoram        | Mamit                 | 40.4                         | 67.7             | (62.2 - 73.2)      | 27.3       |
| 83      | Madhya Pradesh | Alirajpur             | 22.6                         | 66               | (61.3-70.6)        | 43.4       |
| 84      | Madhya Pradesh | Chhatarpur            | 41.1                         | 56.3             | (52.1-60.5)        | 15.2       |
| 85      | Madhya Pradesh | Indore                | 57.8                         | 76.1             | (66.5-85.7)        | 18.3       |
| 86      | Madhya Pradesh | Jhabua                | 25                           | 56.6             | (51.9-61.4)        | 31.6       |
| 87      | Madhya Pradesh | Panna                 | 26.6                         | 71.8             | (67.5-76.1)        | 45.2       |
| 88      | Madhya Pradesh | Raisen                | 78.5                         | 83.5             | (79.8-87.2)        | 5          |
| 89      | Madhya Pradesh | Rewa                  | 52.8                         | 82               | (78.8-85.2)        | 29.2       |
| 90      | Madhya Pradesh | Sagar                 | 52.7                         | 87.9             | (85.2-90.6)        | 35.2       |
| 91      | Madhya Pradesh | Shadol                | 40.3                         | 73.4             | (69.7-77.1)        | 33.1       |
| 92      | Madhya Pradesh | Sheopur               | 48.7                         | 74.1             | (70.5-77.6)        | 25.4       |
| 93      | Madhya Pradesh | Sidhi                 | 34.4                         | 67.8             | (63.7-71.9)        | 33.4       |

| Sl. No. | State          | District       | FIC- NFHS 4 <sup>2</sup> (%) | FIC -IMI CES (%) | CI FIC-IMI CES (%) | Change (%) |
|---------|----------------|----------------|------------------------------|------------------|--------------------|------------|
| 94      | Madhya Pradesh | Singrauli      | 42.2                         | 66.7             | (62.9-70.6)        | 24.5       |
| 95      | Madhya Pradesh | Tikamgarh      | 34.4                         | 68.7             | (64.7-72.7)        | 34.3       |
| 96      | Madhya Pradesh | Vidisha        | 45.7                         | 78.5             | (75.1-82.0)        | 32.8       |
| 97      | Nagaland       | Dimapur        | 33.7                         | 82.8             | (78.9 - 86.7)      | 49.1       |
| 98      | Nagaland       | Kiphire        | 36                           | 60.2             | (54.8 - 65.7)      | 24.2       |
| 99      | Nagaland       | Kohima         | 60.5                         | 83.2             | (78.4 - 88.0)      | 22.7       |
| 100     | Nagaland       | Longleng       | 10.8                         | 62.3             | (55.8 - 68.8)      | 51.5       |
| 101     | Nagaland       | Mokokchung     | 51.9                         | 84.9             | (80.0 - 89.8)      | 33         |
| 102     | Nagaland       | Mon            | 19.9                         | 61.9             | (57.0 - 66.9)      | 42         |
| 103     | Nagaland       | Peren          | 49.1                         | 60.5             | (54.5 - 66.5)      | 11.4       |
| 104     | Nagaland       | Phek           | 34.7                         | 71.6             | (66.8 - 76.3)      | 36.9       |
| 105     | Nagaland       | Tuensang       | 44.9                         | 65               | (60.4 - 69.5)      | 20.1       |
| 106     | Nagaland       | Wokha          | 22.1                         | 61.9             | (55.5 - 68.4)      | 39.8       |
| 107     | Nagaland       | Zunheboto      | 24.7                         | 71.1             | (63.9 - 78.3)      | 46.4       |
| 108     | Odisha         | Ganjam         | 54.2                         | 93.5             | (90.5 - 96.6)      | 39.3       |
| 109     | Odisha         | Khurda         | 73.2                         | 92.7             | (89.3 - 96.2)      | 19.5       |
| 110     | Rajasthan      | Alwar          | 47.4                         | 58               | (54.0-62.0)        | 10.6       |
| 111     | Rajasthan      | Barmer         | 36                           | 45.2             | (41.0-49.4)        | 9.2        |
| 112     | Rajasthan      | Bikaner        | 56                           | 64.1             | (60.1-68.0)        | 8.1        |
| 113     | Rajasthan      | Dhaulpur       | 55.8                         | 66.7             | (62.8-70.5)        | 10.9       |
| 114     | Rajasthan      | Jaipur         | 58.2                         | 61.3             | (57.3-65.4)        | 3.1        |
| 115     | Rajasthan      | Jalor          | 35.7                         | 73.5             | (69.7-77.3)        | 37.8       |
| 116     | Rajasthan      | Jodhpur        | 42.1                         | 57.8             | (53.7-61.9)        | 15.7       |
| 117     | Rajasthan      | Karauli        | 54.6                         | 71.2             | (67.5-74.9)        | 16.6       |
| 118     | Rajasthan      | Pali           | 57.6                         | 60.2             | (56.1-64.3)        | 2.6        |
| 119     | Rajasthan      | Partapgarh     | 66.3                         | 67.7             | (63.6-71.8)        | 1.4        |
| 120     | Rajasthan      | Sawai Madhopur | 46                           | 49.8             | (45.7-53.9)        | 3.8        |
| 121     | Rajasthan      | Udaipur        | 43.9                         | 52.8             | (48.7-56.9)        | 8.9        |
| 122     | Sikkim         | East District  | 79.2                         | 83.6             | (77.9 - 89.3)      | 4.4        |
| 123     | Sikkim         | West District  | 78.4                         | 96.3             | (93.8 - 98.8)      | 17.9       |
| 124     | Tripura        | Dhalai         | 44.3                         | 73.8             | (68.5 - 79.1)      | 29.5       |
| 125     | Tripura        | Tripura North  | 53.8                         | 74.5             | (69.3 - 79.6)      | 20.7       |

| Sl. No. | State         | District       | FIC- NFHS 4 <sup>2</sup> (%) | FIC -IMI CES (%) | CI FIC-IMI CES (%) | Change (%) |
|---------|---------------|----------------|------------------------------|------------------|--------------------|------------|
| 126     | Tripura       | Tripura South  | 54.7                         | 90.1             | (86.4 - 93.8)      | 35.4       |
| 127     | Tripura       | Tripura West   | 56.7                         | 91               | (87.4 - 94.6)      | 34.3       |
| 128     | Tripura       | Unakoti        | 53.8                         | 74.5             | (69.2 - 79.8)      | 20.7       |
| 129     | Uttar Pradesh | Agra           | 60.9                         | 80.1             | (76.9-83.4)        | 19.2       |
| 130     | Uttar Pradesh | Aligarh        | 67.9                         | 72.4             | (68.6-76.3)        | 4.5        |
| 131     | Uttar Pradesh | Allahabad      | 37.9                         | 45.4             | (41.2-49.6)        | 7.5        |
| 132     | Uttar Pradesh | Ambedkar Nagar | 61.2                         | 67.5             | (63.4-71.7)        | 6.3        |
| 133     | Uttar Pradesh | Auraiya        | 34                           | 43.7             | (39.4-48.0)        | 9.7        |
| 134     | Uttar Pradesh | Azamgarh       | 35.2                         | 45.2             | (40.9-49.5)        | 10         |
| 135     | Uttar Pradesh | Badaun         | 51.5                         | 62               | (58.1-66.0)        | 10.5       |
| 136     | Uttar Pradesh | Sant Ravidas   | 43.1                         | 72               | (68.4-75.7)        | 28.9       |
| 137     | Uttar Pradesh | Bahraich       | 9.4                          | 41.4             | (35.2-47.7)        | 32         |
| 138     | Uttar Pradesh | Ballia         | 43.8                         | 85.4             | (82.6-88.3)        | 41.6       |
| 139     | Uttar Pradesh | Balrampur      | 7.1                          | 49.1             | (41.9-56.3)        | 42         |
| 140     | Uttar Pradesh | Banda          | 42.8                         | 67.8             | (64.0-71.6)        | 25         |
| 141     | Uttar Pradesh | Barabanki      | 40.1                         | 54.3             | (50.2-58.5)        | 14.2       |
| 142     | Uttar Pradesh | Bareilly       | 48.7                         | 71.2             | (67.5-74.8)        | 22.5       |
| 143     | Uttar Pradesh | Basti          | 57.5                         | 73.4             | (69.8-77.0)        | 15.9       |
| 144     | Uttar Pradesh | Bijnor         | 70.1                         | 76.7             | (72.9-80.5)        | 6.6        |
| 145     | Uttar Pradesh | Bulandshahar   | 57.3                         | 76.8             | (73.4-80.3)        | 19.5       |
| 146     | Uttar Pradesh | Chitrakoot     | 67.7                         | 83.2             | (79.9-86.4)        | 15.5       |
| 147     | Uttar Pradesh | Deoria         | 63.8                         | 74.5             | (70.8-78.3)        | 10.7       |
| 148     | Uttar Pradesh | Etah           | 48                           | 50.5             | (46.5-54.5)        | 2.5        |
| 149     | Uttar Pradesh | Farrukhabad    | 38.6                         | 40.3             | (36.2-44.4)        | 1.7        |
| 150     | Uttar Pradesh | Fatehpur       | 48.4                         | 52.5             | (48.5-56.6)        | 4.1        |
| 151     | Uttar Pradesh | Ferozabad      | 58.8                         | 71.9             | (68.2-75.6)        | 13.1       |
| 152     | Uttar Pradesh | Ghaziabad      | 61.1                         | 68.7             | (64.8-72.5)        | 7.6        |
| 153     | Uttar Pradesh | Ghazipur       | 40.2                         | 66.8             | (62.9-70.7)        | 26.6       |
| 154     | Uttar Pradesh | Gonda          | 36.8                         | 54               | (49.6-58.4)        | 17.2       |
| 155     | Uttar Pradesh | Gorakhpur      | 65.4                         | 87.8             | (85.0-90.6)        | 22.4       |
| 156     | Uttar Pradesh | Hapur          | 61.1                         | 83.1             | (80.0-86.3)        | 22         |
| 157     | Uttar Pradesh | Hardoi         | 39.1                         | 65.9             | (62.0-69.8)        | 26.8       |

| Sl. No. | State         | District         | FIC- NFHS 4 <sup>2</sup> (%) | FIC -IMI CES (%) | CI FIC-IMI CES (%) | Change (%) |
|---------|---------------|------------------|------------------------------|------------------|--------------------|------------|
| 158     | Uttar Pradesh | Jaunpur          | 53.1                         | 81.4             | (78.2-84.6)        | 28.3       |
| 159     | Uttar Pradesh | Kannauj          | 48.7                         | 48.9             | (44.8-53.0)        | 0.2        |
| 160     | Uttar Pradesh | Kanpur (Nagar)   | 50.9                         | 55.9             | (51.7-60.0)        | 5          |
| 161     | Uttar Pradesh | Kasganj          | 47.2                         | 47.2             | (43.0-51.3)        | 0          |
| 162     | Uttar Pradesh | Kaushambi        | 37.1                         | 56.5             | (52.4-60.6)        | 19.4       |
| 163     | Uttar Pradesh | Kheri            | 53.1                         | 65.7             | (61.8-69.6)        | 12.6       |
| 164     | Uttar Pradesh | Kushinagar       | 43.7                         | 62.3             | (58.3-66.3)        | 18.6       |
| 165     | Uttar Pradesh | Lalitpur         | 61.1                         | 78.7             | (75.3-82.1)        | 17.6       |
| 166     | Uttar Pradesh | Lucknow          | 58.8                         | 58.5             | (54.3-62.7)        | -0.3       |
| 167     | Uttar Pradesh | Maharajganj      | 41.7                         | 65.7             | (61.6-69.9)        | 24         |
| 168     | Uttar Pradesh | Mainpuri         | 55.7                         | 60.6             | (56.6-64.6)        | 4.9        |
| 169     | Uttar Pradesh | Mathura          | 51.5                         | 81.7             | (78.6-84.8)        | 30.2       |
| 170     | Uttar Pradesh | Mau              | 46.4                         | 67.9             | (64.2-71.7)        | 21.5       |
| 171     | Uttar Pradesh | Meerut           | 62.8                         | 71.3             | (67.5-75.0)        | 8.5        |
| 172     | Uttar Pradesh | Mirzapur         | 46.5                         | 54.3             | (50.3-58.4)        | 7.8        |
| 173     | Uttar Pradesh | Moradabad        | 49.9                         | 71.6             | (68.1-75.1)        | 21.7       |
| 174     | Uttar Pradesh | Muzaffarnagar    | 63.7                         | 67.8             | (63.8-71.8)        | 4.1        |
| 175     | Uttar Pradesh | Pratapgarh       | 49.5                         | 68.9             | (65.1-72.6)        | 19.4       |
| 176     | Uttar Pradesh | Raebareili       | 61.8                         | 70.9             | (67.1-74.8)        | 9.1        |
| 177     | Uttar Pradesh | Rampur           | 68.3                         | 86.7             | (83.7-89.7)        | 18.4       |
| 178     | Uttar Pradesh | Saharanur        | 62.6                         | 63.1             | (59.1-67.2)        | 0.5        |
| 179     | Uttar Pradesh | Sambhal          | 49.9                         | 60.1             | (56.1-64.1)        | 10.2       |
| 180     | Uttar Pradesh | Sant Kabir Nagar | 43.3                         | 69.7             | (65.9-73.5)        | 26.4       |
| 181     | Uttar Pradesh | Shahjanpur       | 65.3                         | 70.7             | (66.8-74.6)        | 5.4        |
| 182     | Uttar Pradesh | Siddharth Nagar  | 35.3                         | 78.6             | (74.9-82.2)        | 43.3       |
| 183     | Uttar Pradesh | Sitapur          | 44.8                         | 51.3             | (47.2-55.4)        | 6.5        |
| 184     | Uttar Pradesh | Sonbhadra        | 30.3                         | 44               | (39.6-48.4)        | 13.7       |
| 185     | Uttar Pradesh | Srawast          | 17.3                         | 70.2             | (65.1-75.3)        | 52.9       |
| 186     | Uttar Pradesh | Sultanpur        | 48.9                         | 53.7             | (49.7-57.8)        | 4.8        |
| 187     | Uttar Pradesh | Unao             | 57.4                         | 59.9             | (55.8-64.0)        | 2.5        |
| 188     | Uttar Pradesh | Varanasi         | 59                           | 66.4             | (62.4-70.4)        | 7.4        |
| 189     | Uttrakhand    | Hardwar          | 55.3                         | 84.4             | (79.4 - 89.5)      | 29.1       |

| Sl. No. | State                      | District          | FIC- NFHS 4 <sup>2</sup> (%) | FIC -IMI CES (%) | CI FIC-IMI CES (%) | Change (%) |
|---------|----------------------------|-------------------|------------------------------|------------------|--------------------|------------|
| 190     | West Bengal                | 24-Parganas North | 88.7                         | 96.9             | (95.1 - 98.6)      | 8.2        |
|         | <b>UNDP 120 Districts</b>  | -                 | 50.0                         | 67.0             | -                  | 17*        |
|         | <b>WHO 70 Districts</b>    | -                 | 51.2                         | 76.4             | -                  | 25.2*      |
|         | <b>Total 190 Districts</b> | -                 | 50.5                         | 69.0             | -                  | 18.5*      |

<sup>1</sup> International Institute for Population Sciences (IIPS) and ICF. National Family Health Survey (NFHS-4), 2015-16: India. Mumbai: IIPS; 2017; and Ministry of Health and Family Welfare (MOHFW). Coverage Evaluation Survey- Intensified Mission Indradhanush. Delhi, India: MOHFW; 2018.

<sup>2</sup> The 95% confidence intervals for the FIC for individual districts in NFHS 4 survey are not available.

<sup>3</sup> Statistically significant (p = 0.000)

Notes: FIC: Full immunization coverage in children aged 12-23 months age  
 NFHS 4- National Family Health Survey (2015-16)  
 IMI-CES: Intensified Mission Indradhanush Coverage Evaluation Survey 2018  
 UNDP: United Nations Development Programme  
 WHO: World Health Organisation  
 CI: 95% Confidence Interval

**Supplementary Table 2: Changes in Full Immunization Coverage (FIC) by state and Region targeted for IMI, population-based coverage surveys, 2015/16 and 2018**

| State/Region         | FIC- NFHS 4 (%) | 95% CI <sup>1</sup> | Post-IMI CES (%) | 95% CI     | Change in FIC (%) |
|----------------------|-----------------|---------------------|------------------|------------|-------------------|
| Assam                | 35.7            | 28.8, 43.6          | 66.6             | 57.5, 75.9 | 30.9              |
| Bihar                | 56.5            | 62.3, 72.2          | 71.8             | 67.9, 75.9 | 15.3              |
| Madhya Pradesh       | 46.0            | 35.3, 50.9          | 72.4             | 67.2, 76.9 | 26.4              |
| Maharashtra          | 50.4            | 44.7, 61.1          | 70.7             | 64.2, 78.6 | 20.3              |
| Rajasthan            | 49.0            | 44.6, 55.4          | 60.6             | 55.8, 65.6 | 11.6              |
| Uttar Pradesh        | 50.1            | 46.0, 52.8          | 65.3             | 61.8, 68.0 | 15.2              |
| North East Districts | 48.1            | 40.6, 50.8          | 72.0             | 68.6, 76.5 | 23.9              |
| Rest states          | 54.0            | 23.5, 37.3          | 84.7             | 42.6, 52.0 | 30.7              |
| All states           | 50.5            | 48.5, 52.9          | 69               | 67.0, 70.9 | 18.5              |

<sup>1</sup>The 95% confidence intervals for the FIC at state or region level were estimated by aggregating district data from NFHS 4 survey.



**Supplementary File 2: Summary of data from IMI session monitoring reports**

**Supplementary Table 3: Summary of IMI service delivery process indicators, October 2017 – January 2018**

| State             | Total number     |               | Percentage <sup>1</sup>       |                                               |                     |                                               |
|-------------------|------------------|---------------|-------------------------------|-----------------------------------------------|---------------------|-----------------------------------------------|
|                   | Districts in IMI | Sessions held | Sessions with head-count done | Sessions with due list available <sup>2</sup> | Sessions Supervised | Children on due lists vaccinated <sup>3</sup> |
| Andhra Pradesh    | 2                | 249           | 90                            | 85                                            | 55                  | 62                                            |
| Arunachal Pradesh | 13               | 67            | 91                            | 62                                            | 69                  | 60                                            |
| Assam             | 7                | 341           | 94                            | 93                                            | 76                  | 76                                            |
| Bihar             | 16               | 11292         | 97                            | 78                                            | 71                  | 67                                            |
| Delhi             | 3                | 1392          | 96                            | 79                                            | 14                  | 68                                            |
| Gujarat           | 3                | 400           | 99                            | 84                                            | 70                  | 63                                            |
| Haryana           | 4                | 942           | 81                            | 81                                            | 40                  | 48                                            |
| Jammu & Kashmir   | 1                | 114           | 52                            | 81                                            | 69                  | 70                                            |
| Jharkhand         | 2                | 1198          | 87                            | 84                                            | 41                  | 53                                            |
| Karnataka         | 3                | 1060          | 99                            | 95                                            | 55                  | 72                                            |
| Kerala            | 1                | 91            | 100                           | 100                                           | 97                  | 25                                            |
| Madhya Pradesh    | 14               | 5015          | 86                            | 93                                            | 65                  | 78                                            |
| Maharashtra       | 11               | 4127          | 100                           | 89                                            | 71                  | 52                                            |
| Manipur           | 4                | 178           | 97                            | 85                                            | 30                  | 17                                            |
| Meghalaya         | 7                | 135           | 100                           | 100                                           | 47                  | 53                                            |
| Mizoram           | 3                | 33            | 67                            | 82                                            | 58                  | 20                                            |
| Nagaland          | 11               | 50            | 100                           | 64                                            | 32                  | 37                                            |
| Odisha            | 2                | 363           | 100                           | 99                                            | 47                  | 60                                            |
| Rajasthan         | 12               | 3826          | 98                            | 94                                            | 40                  | 73                                            |
| Sikkim            | 2                | 14            | 100                           | 43                                            | 100                 | 95                                            |
| Tripura           | 5                | 75            | 93                            | 77                                            | 61                  | 13                                            |
| Uttar Pradesh     | 60               | 63796         | 99                            | 88                                            | 90                  | 69                                            |
| Uttrakhand        | 1                | 393           | 100                           | 77                                            | 44                  | 59                                            |
| West Bengal       | 1                | 524           | 88                            | 44                                            | 45                  | 53                                            |
| <b>India</b>      | <b>187</b>       | <b>95675</b>  | <b>92</b>                     | <b>82</b>                                     | <b>58</b>           | <b>57</b>                                     |
| <b>Rural</b>      | <b>118</b>       | <b>80320</b>  | <b>92</b>                     | <b>84</b>                                     | <b>58</b>           | <b>62</b>                                     |
| <b>Urban</b>      | <b>17</b>        | <b>14462</b>  | <b>96</b>                     | <b>91</b>                                     | <b>66</b>           | <b>63</b>                                     |
| <b>North East</b> | <b>52</b>        | <b>893</b>    | <b>93</b>                     | <b>76</b>                                     | <b>59</b>           | <b>46</b>                                     |

<sup>1</sup> Based on monitoring visits to a total of 95675 (98%) IMI vaccination sessions

<sup>2</sup> Due lists include unimmunized children and vaccination drop-outs requiring additional antigens

<sup>3</sup> Monitoring data for 18 districts not available: (Arunachal Pradesh- 6, Meghalaya 3, Mizoram-1, Nagaland-7, and Sikkim-1) (all data Internal communication, Ministry of Health and Family Welfare, Government of India)
